# Supplementary material for: Do Surface Charges on Polymeric Filters and Airborne Particles Control the Removal of Nanoscale Aerosols by Polymeric Facial Masks?
Source: MDPI journal article supplement (doi:10.3390/toxics12010003), 2023-12-19
Supplement: s1 [file s1]

Supplementary materials

# Do Surface Charges on Polymeric Filters and Airborne Particles Control the Removal of Nanoscale Aerosols by Polymeric Facial Masks?

Zhaobo Zhang <sup>1</sup>, Mahmut S. Ersan <sup>2,3</sup>, Paul Westerhoff <sup>2</sup> and Pierre Herckes <sup>1,\*</sup>

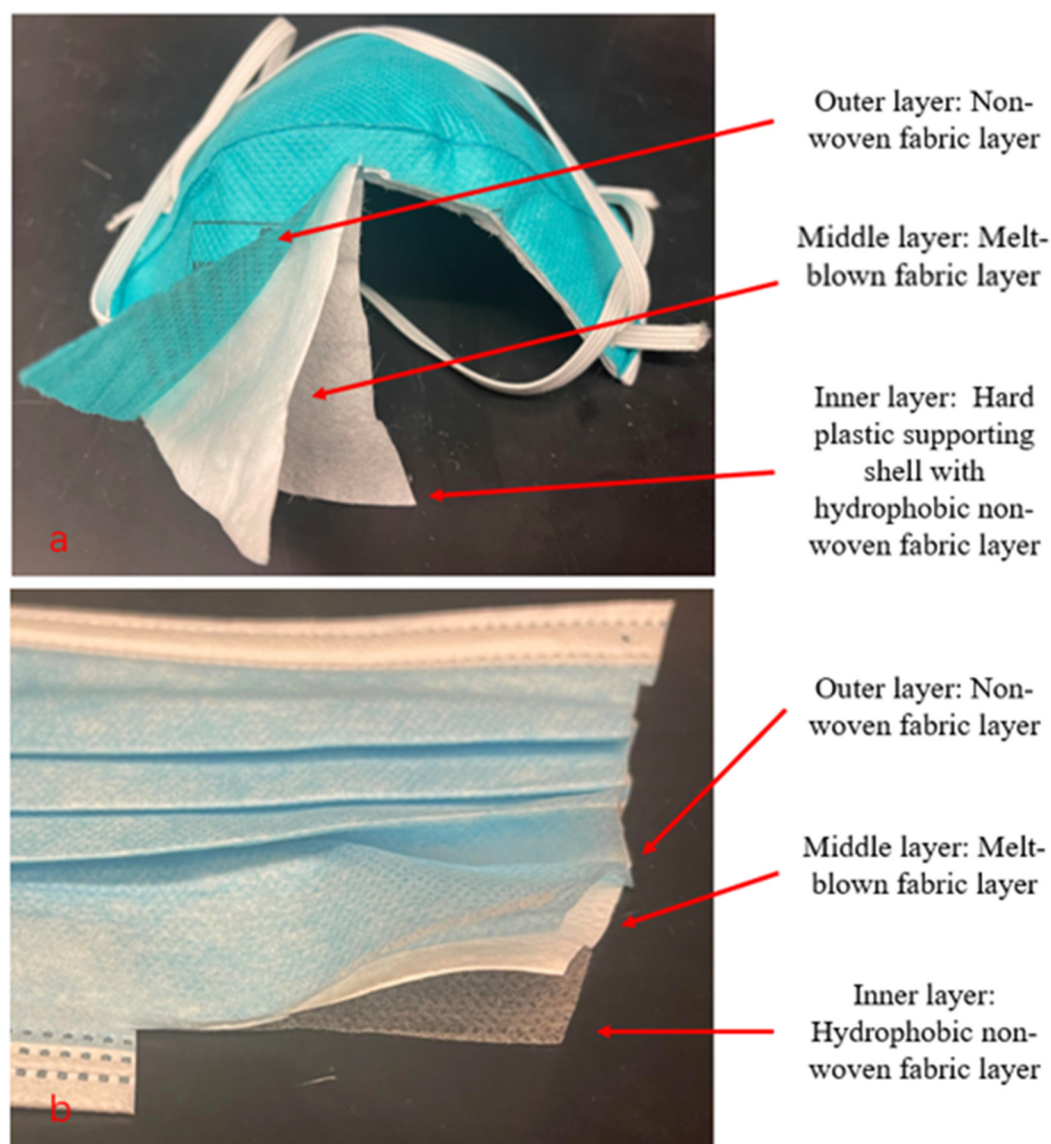

**Figure S1.** Multi-layer structure image of (a) N95 mask and (b) surgical mask.

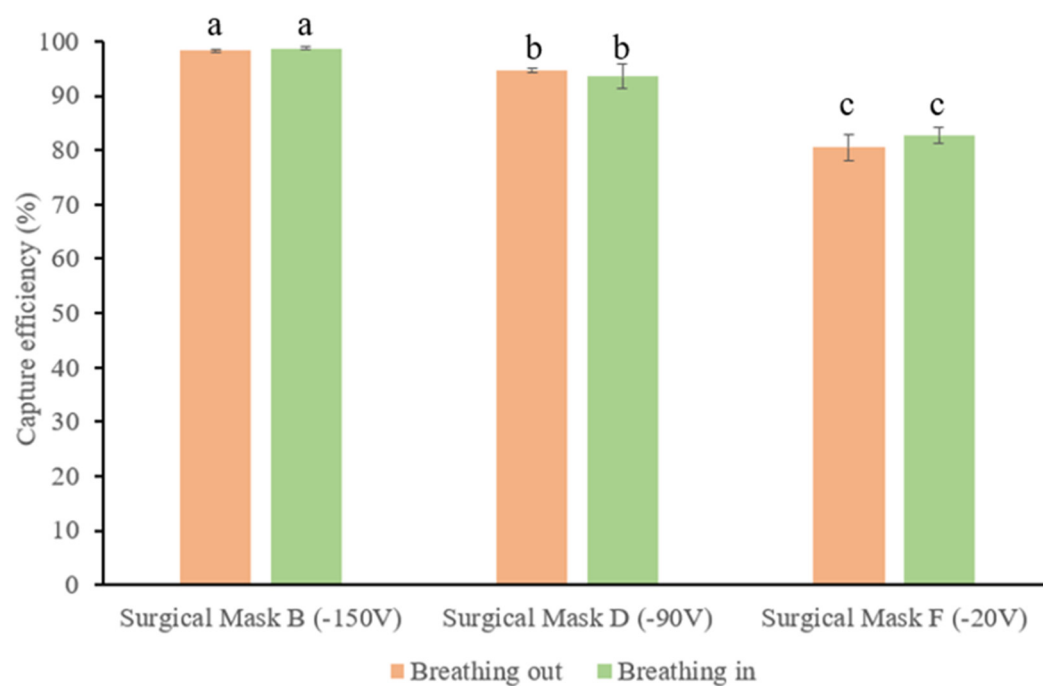

**Figure S2.** Comparison of mask filtration efficiencies with different flow directions, which represent the capture efficiency for breathing in and breathing out. Different letters (a, b, c) on the colored bars mean the experimental results are statistically different ( $p < 0.05$ ) based on a two-tailed unpaired Student's t-test.

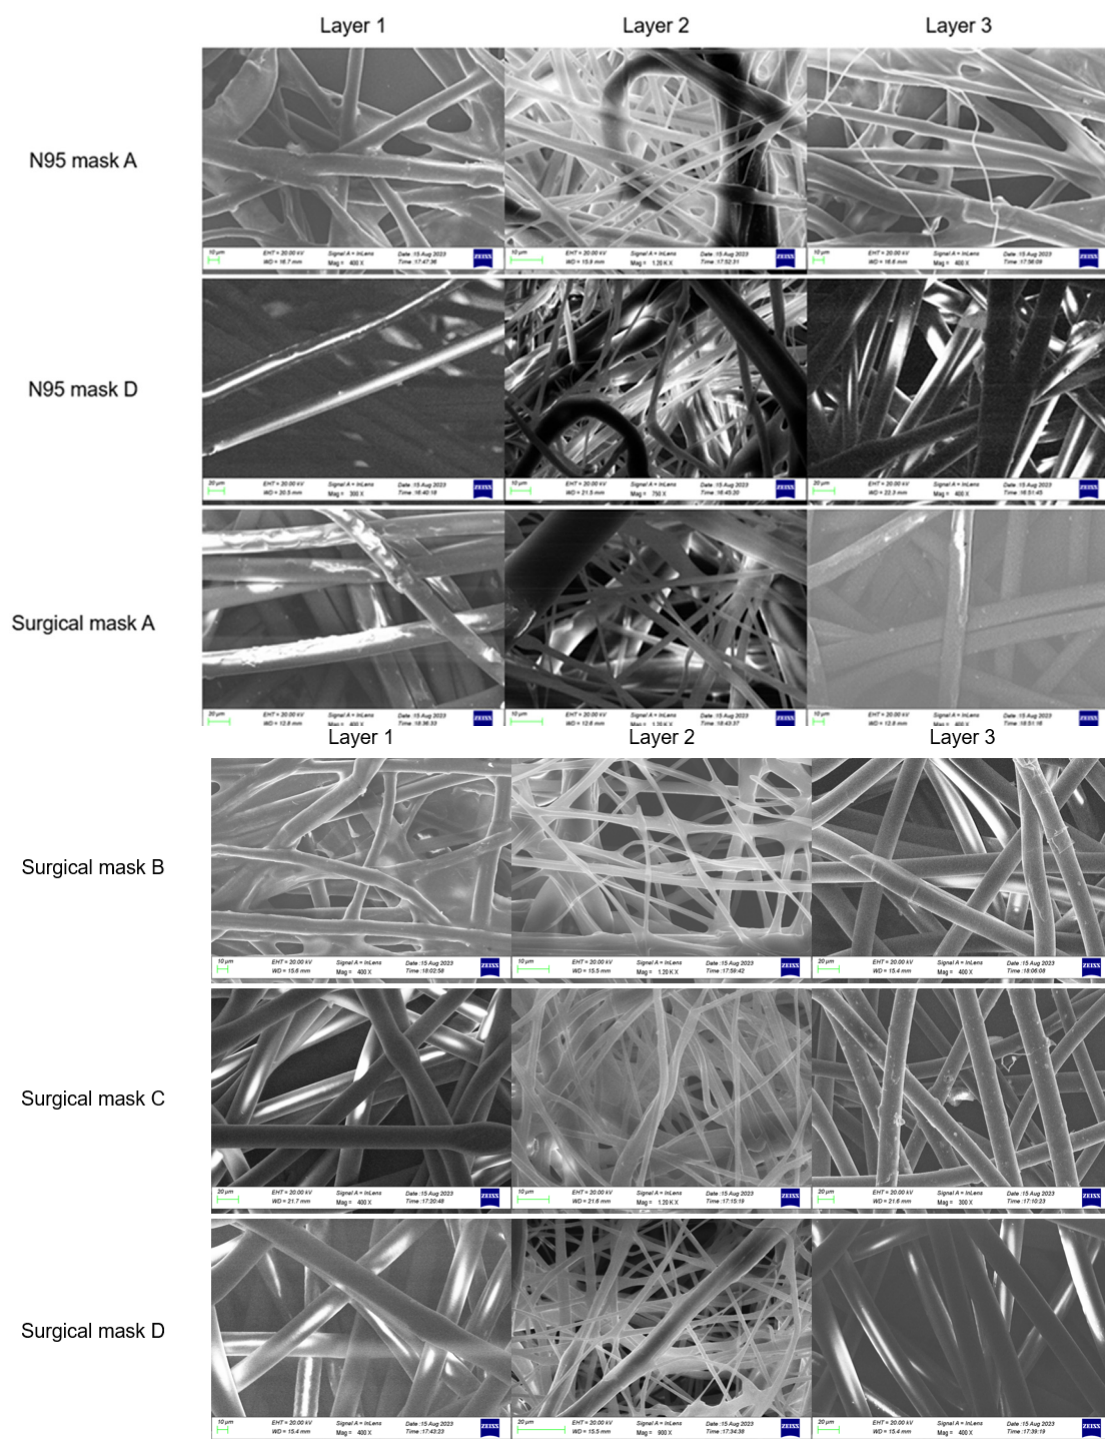

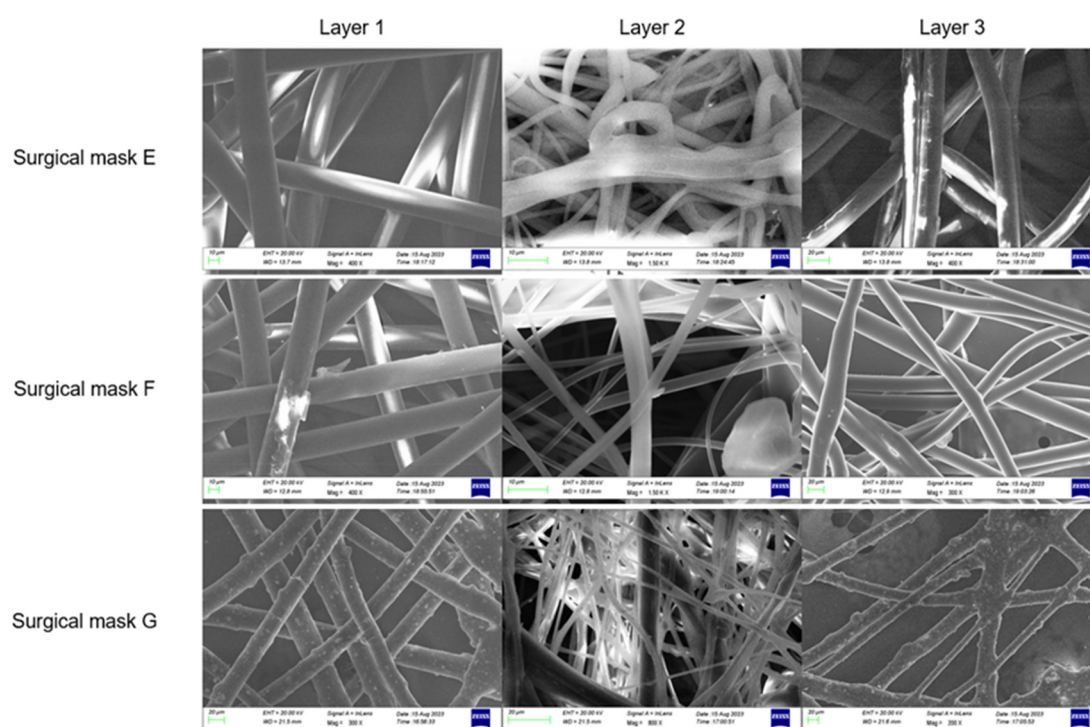

**Figure S3.** SEM images of each fiber layer for the masks used in this study.

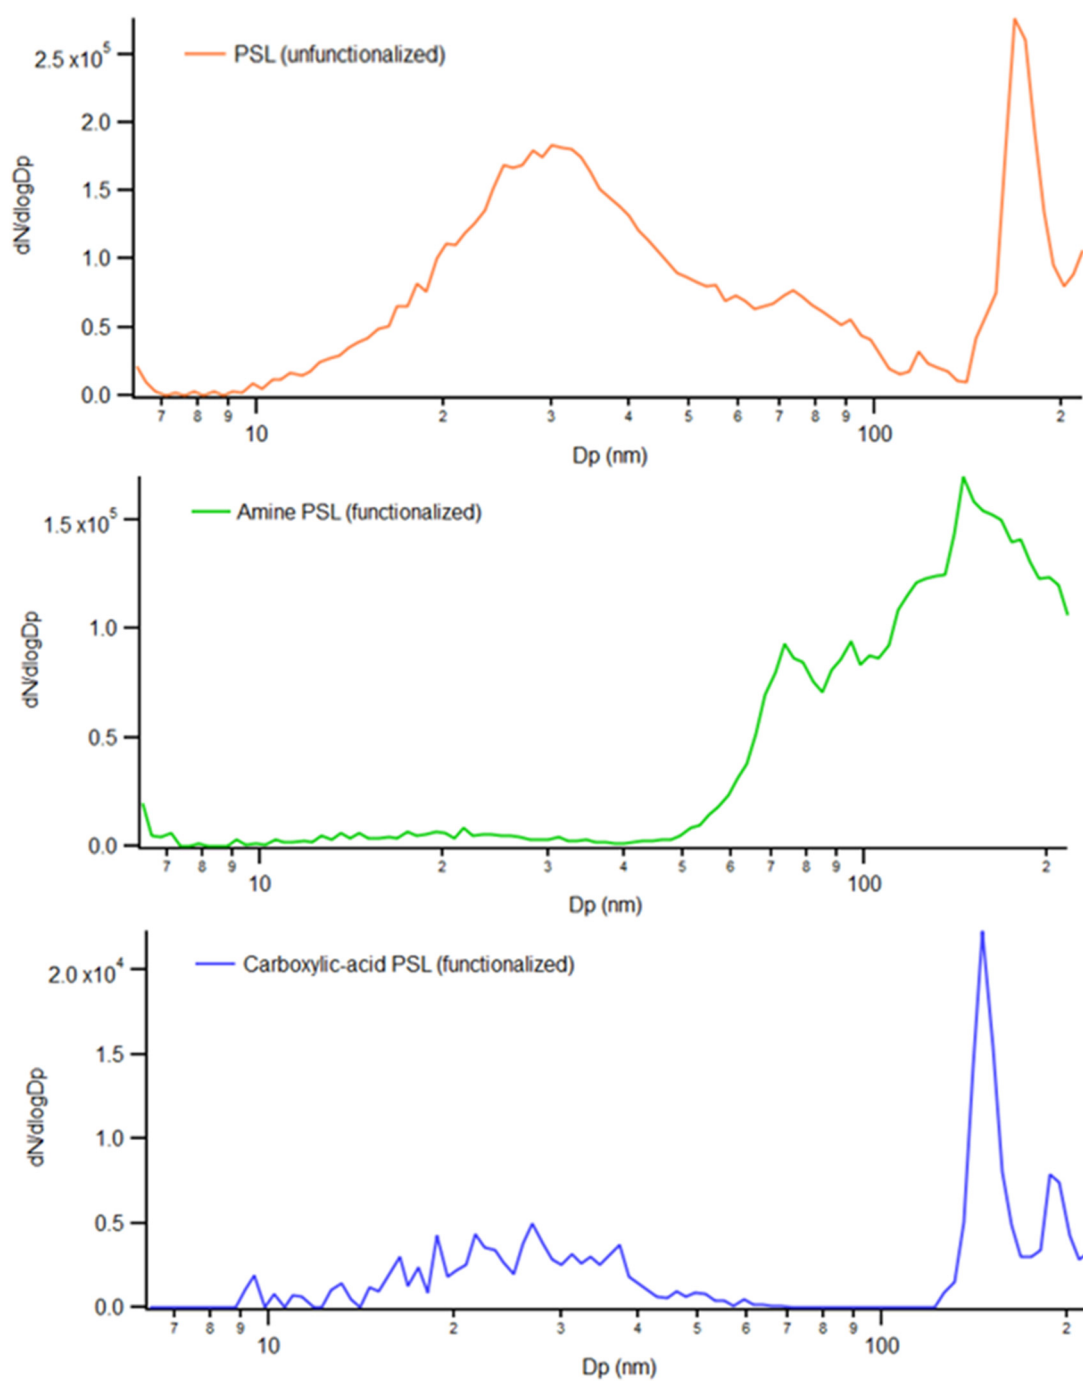

**Figure S4.** SMPS spectrum of particle (150 nm PSL, amine-PSL, and carboxylic acid-PSL) size distribution while ambient humidity reaches 80% RH. The maximum peak is still around 150 nm without significant growth.

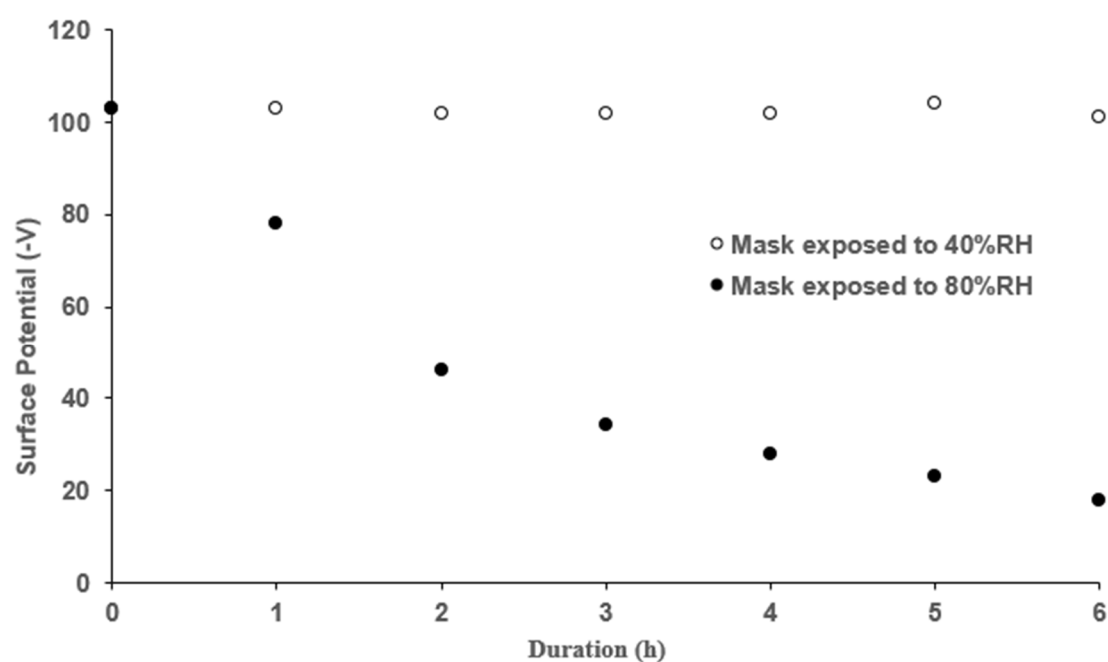

**Figure S5.** Time-resolved decay of surface potential for surgical mask B exposed to 40% RH and 80% RH air.

**Table S1.** SMPS setting parameters.

|                                  |                       |
|----------------------------------|-----------------------|
| Reference gas viscosity (Pa × s) | $1.83 \times 10^{-5}$ |
| Gas temperature (K)              | 297.15                |
| Reference gas temperature (K)    | 296.15                |
| Gas pressure (kPa)               | 95                    |
| Reference gas pressure (kPa)     | 101.3                 |
| Reference gas mean free path (m) | $6.73 \times 10^{-8}$ |

**Table S2.** Zeta potential and size distribution for each challenge aerosol at nebulized pH.

| Challenge aerosol   | Zeta potential (mV) | Mean Diameter (nm)<br>N=5 | pH of nebulization<br>fluid |
|---------------------|---------------------|---------------------------|-----------------------------|
| Carboxylic-acid PSL | $-60 \pm 3$         | $150 \pm 2$               | 6.06                        |
| PSL                 | $-22 \pm 2$         | $150 \pm 4$               | 6.23                        |
| Amine-PSL           | $21 \pm 1$          | $150 \pm 6$               | 9.12                        |

Note: Mean diameter measured by Dynamic light scattering (DLS).

**Table S3.** Remeasured surface potential of masks used for filtration efficiency test, after 2 years of storage.

| Mask type     | Sample number   | Surface potential for test (V) | Remeasured surface potential after two years (V) |
|---------------|-----------------|--------------------------------|--------------------------------------------------|
| N95 mask      | N95 mask A      | $-800 \pm 108$                 | $-765 \pm 144$                                   |
|               | N95 mask B      | $-539 \pm 85$                  | Material ran out                                 |
|               | N95 mask C      | $-440 \pm 53$                  | Material ran out                                 |
|               | N95 mask D      | $-230 \pm 30$                  | $-253 \pm 48$                                    |
| Surgical mask | Surgical mask A | $-160 \pm 18$                  | $-166 \pm 28$                                    |
|               | Surgical mask B | $-150 \pm 20$                  | $-124 \pm 19$                                    |
|               | Surgical mask C | $-100 \pm 12$                  | $-40 \pm 5$                                      |
|               | Surgical mask D | $-90 \pm 10$                   | $-103 \pm 26$                                    |
|               | Surgical mask E | $-55 \pm 5$                    | $-66 \pm 12$                                     |
|               | Surgical mask F | $-20 \pm 10$                   | $-18 \pm 6$                                      |
|               | Surgical mask G | $-10 \pm 5$                    | $-13 \pm 4$                                      |

Note: Only surgical mask C shows significant surface charge dissipation after 2 years of storage.

$$Quality\ Factor = \frac{-\ln\left(1 - \frac{FE_{min}}{100}\right)}{\Delta P}$$

**Table S4.** Quality factor of the masks tested.

| Mask type     | Sample number   | Quality Factor (kPa <sup>-1</sup> ) |
|---------------|-----------------|-------------------------------------|
| N95 mask      | N95 mask A      | 70.6                                |
|               | N95 mask B      | 77.2                                |
|               | N95 mask C      | 68.7                                |
|               | N95 mask D      | 80.3                                |
| Surgical mask | Surgical mask A | 50.5                                |
|               | Surgical mask B | 69.6                                |
|               | Surgical mask C | 85.7                                |
|               | Surgical mask D | 44.1                                |
|               | Surgical mask E | 83.4                                |
|               | Surgical mask F | 54.5                                |
|               | Surgical mask G | 43.5                                |

**Table S5.** Number of charges on particle and corresponding electrical mobility diameter.

| Number of charges | Amine-PSL                         | PSL | Carboxylic acid-PSL |
|-------------------|-----------------------------------|-----|---------------------|
|                   | Electrical Mobility Diameter (nm) |     |                     |
| 1                 | 151                               | 168 | 146                 |
| 2                 | 100                               | 111 | 97                  |
| 3                 | 80                                | 88  | 77                  |
| 4                 | 68                                | 75  | 66                  |
| 5                 | 60                                | 66  | 59                  |
| 6                 | 55                                | 60  | 53                  |
| 7                 | 50                                | 55  | 49                  |
| 8                 | 47                                | 51  | 46                  |
| 9                 | 44                                | 48  | 43                  |
| 10                | 42                                | 46  | 41                  |
| 20                | 29                                | 32  | 28                  |
| 30                | 24                                | 26  | 23                  |
| 40                | 20                                | 22  | 20                  |
| 50                | 18                                | 20  | 18                  |
| 60                | 16                                | 18  | 16                  |
| 70                | 15                                | 17  | 15                  |
| 80                | 14                                | 16  | 14                  |
| 90                | 13                                | 15  | 13                  |
| 100               | 13                                | 14  | 12                  |
| 200               | 8                                 | 9   | 8                   |
| 300               | 6                                 | 7   | 6                   |
